# Supplementary material for: Slip of gels in colloid–polymer mixtures under shear
Source: Royal Society of Chemistry journal article supplement (doi:10.1039/c3sm27626k), 2013-01-01
Supplement: c3sm27626k.pdf [file c3sm27626k.pdf]

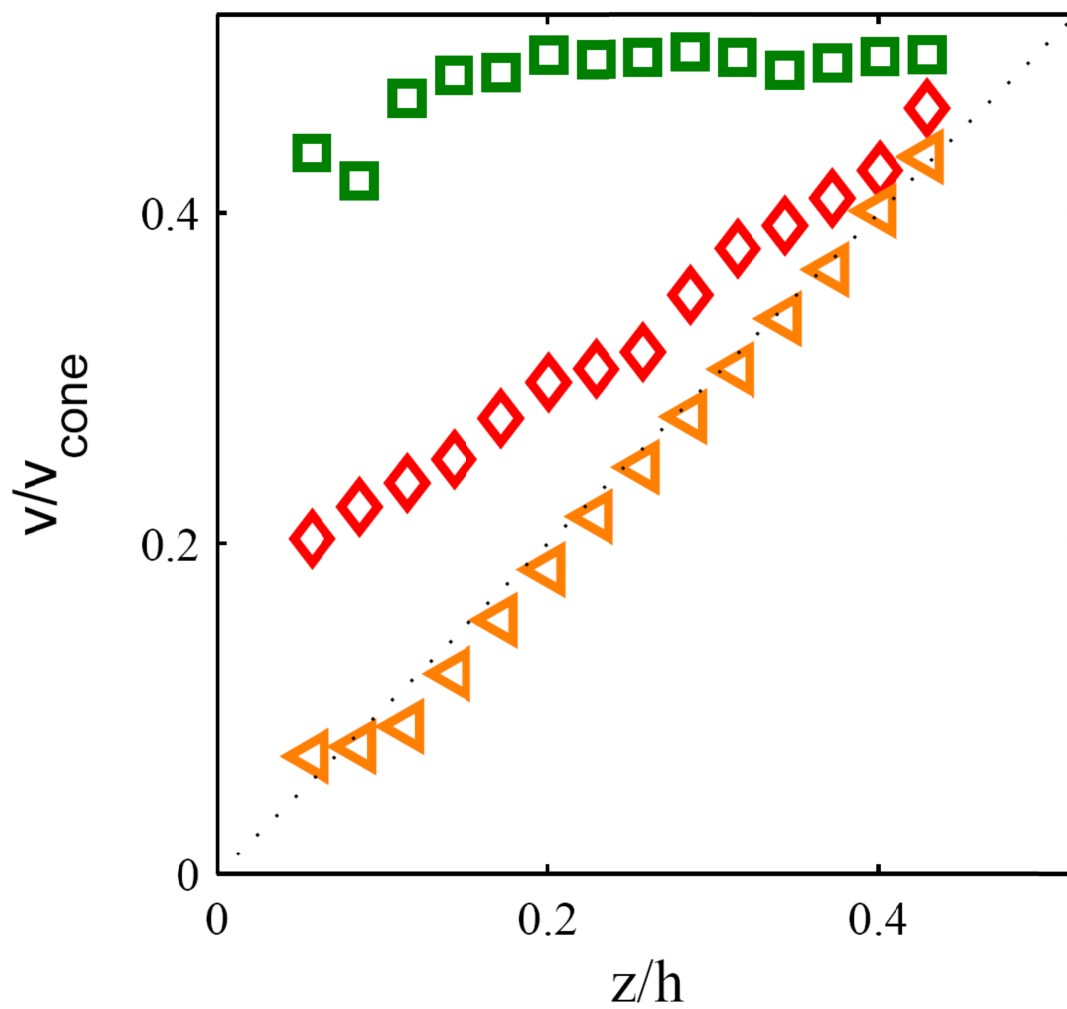

Supplementary Figure: Flow profiles from a colloid-polymer gel with 45% volume fraction,  $c/c^*=0.5$ , at shear rates 0.1 1 and 10 1/s.
